# Supplementary material for: Cetyl alcohol mediated fabrication of forest of Ag/Mn3O4 nanowhiskers catalyst for the selective oxidation of styrene with molecular oxygen
Source: Royal Society of Chemistry journal article supplement (doi:10.1039/c5ra17630a), 2015-01-01
Supplement: c5ra17630a1.pdf [file c5ra17630a1.pdf]

**Electronic Supplementary Information (ESI†)**

**Cetyl alcohol mediated fabrication of forest of Ag/Mn<sub>3</sub>O<sub>4</sub>  
nanowhiskers catalyst for the selective oxidation of styrene with  
molecular oxygen**

Shankha Shubhra Acharyya, Shilpi Ghosh, Sachin Kumar Sharma and Rajaram Bal\*

Catalytic Conversion & Processes Division, CSIR-Indian Institute of Petroleum, Dehradun-  
248005, India

\*Corresponding author. Tel.: +91 135 2525797; Fax: +91 135 2660202

E-mail addresses: [raja@iip.res.in](mailto:raja@iip.res.in)

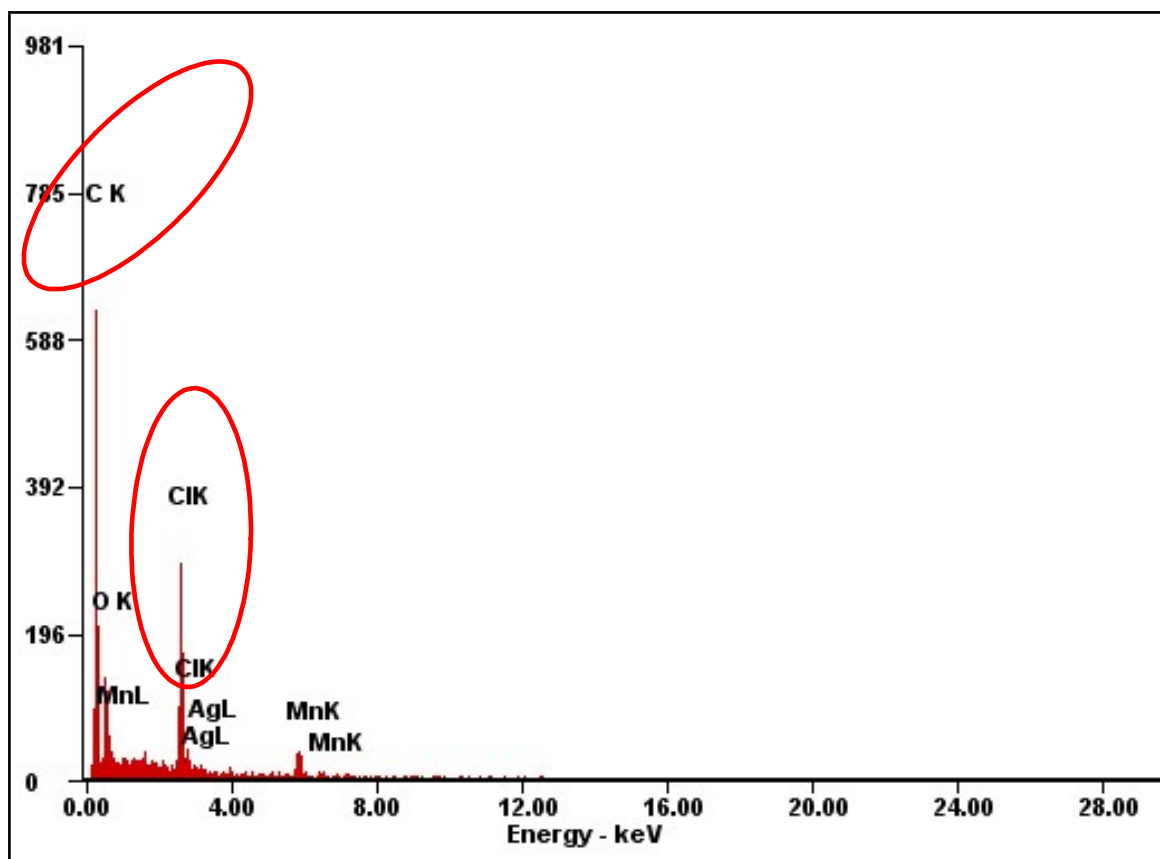

Fig. S1 SEM-EDAX of uncalcined Ag/Mn<sub>3</sub>O<sub>4</sub> nanowhiskers catalyst.

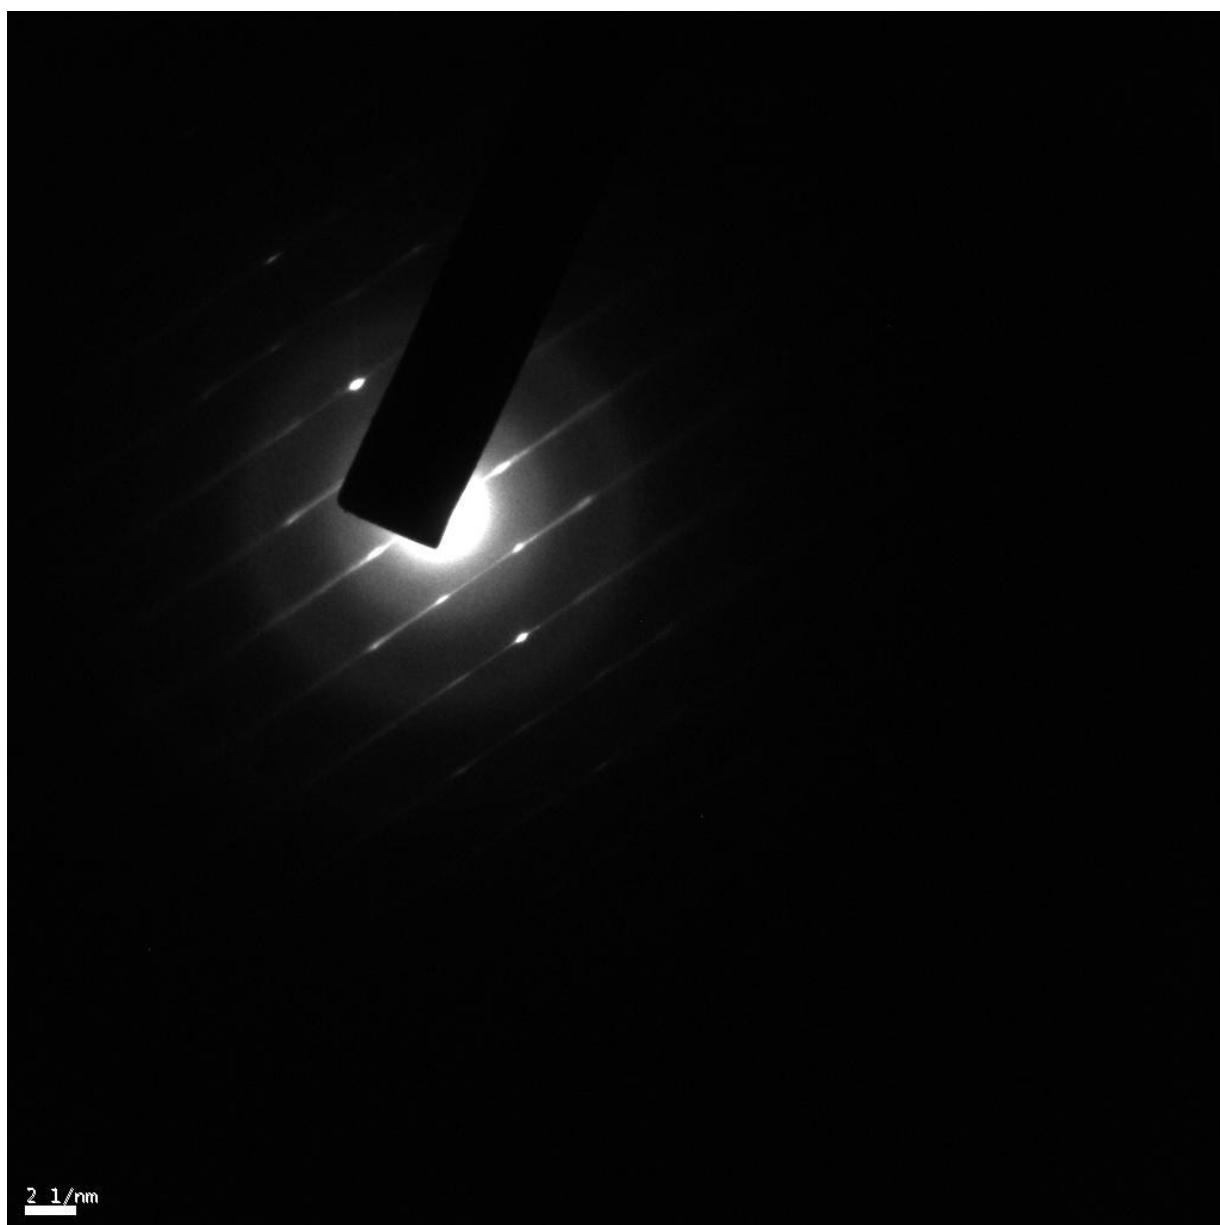

**Fig. S2** TEM-SAED (based on 6c, main) Ag/Mn<sub>3</sub>O<sub>4</sub> nanowhiskers catalyst.

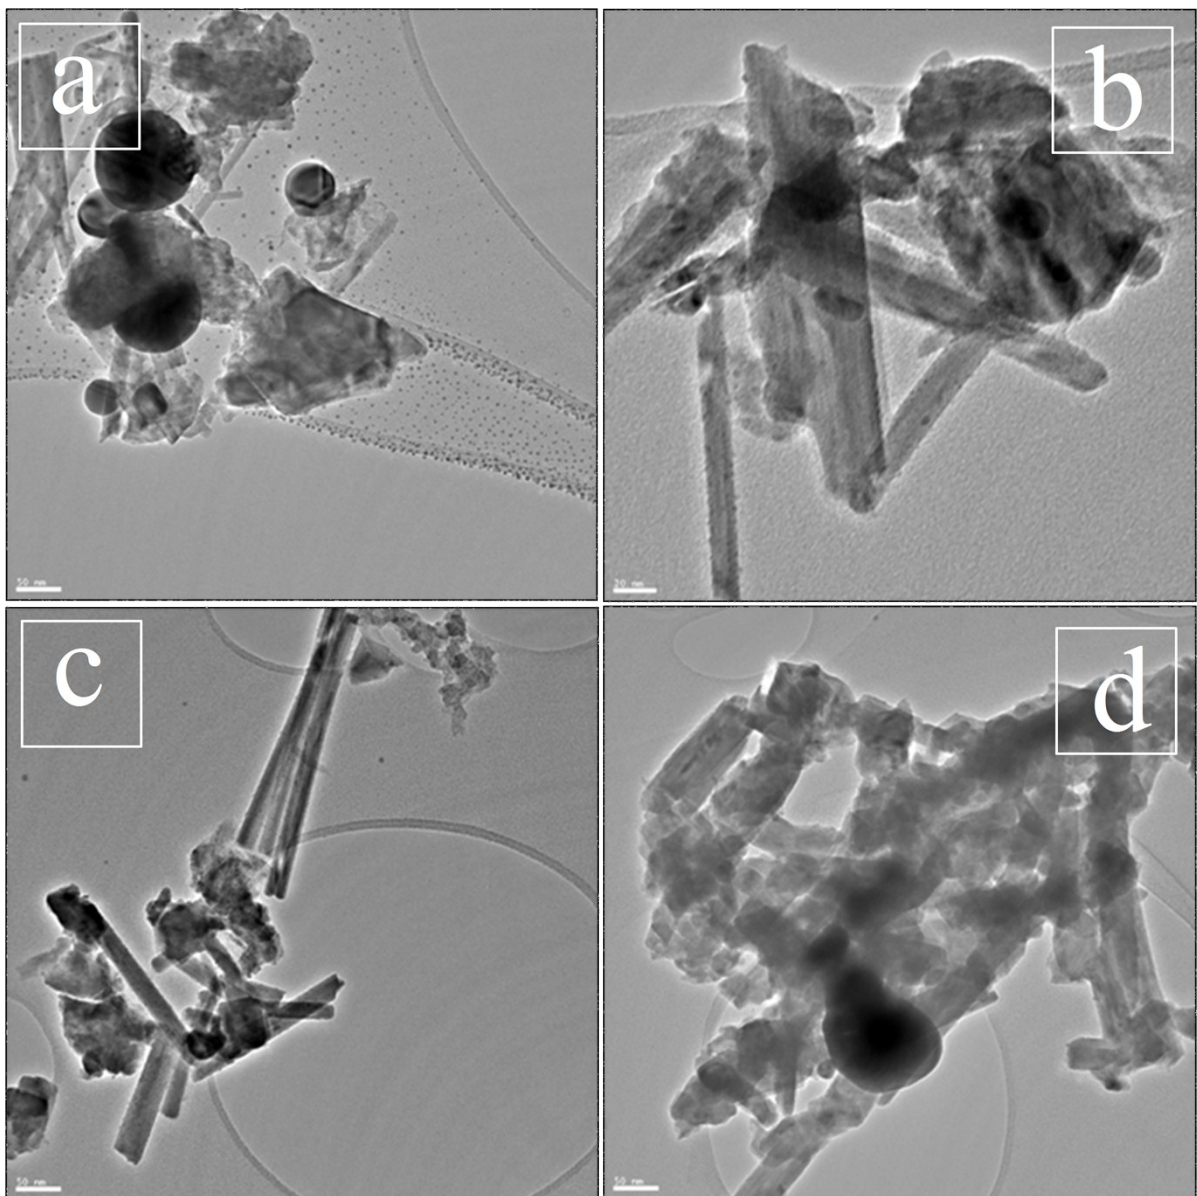

**Fig. S3** TEM images of Ag-Mn composite catalyst: (a) without cetyl alcohol, aging time (b) 3h, (c) 8h and (d) 24 h.

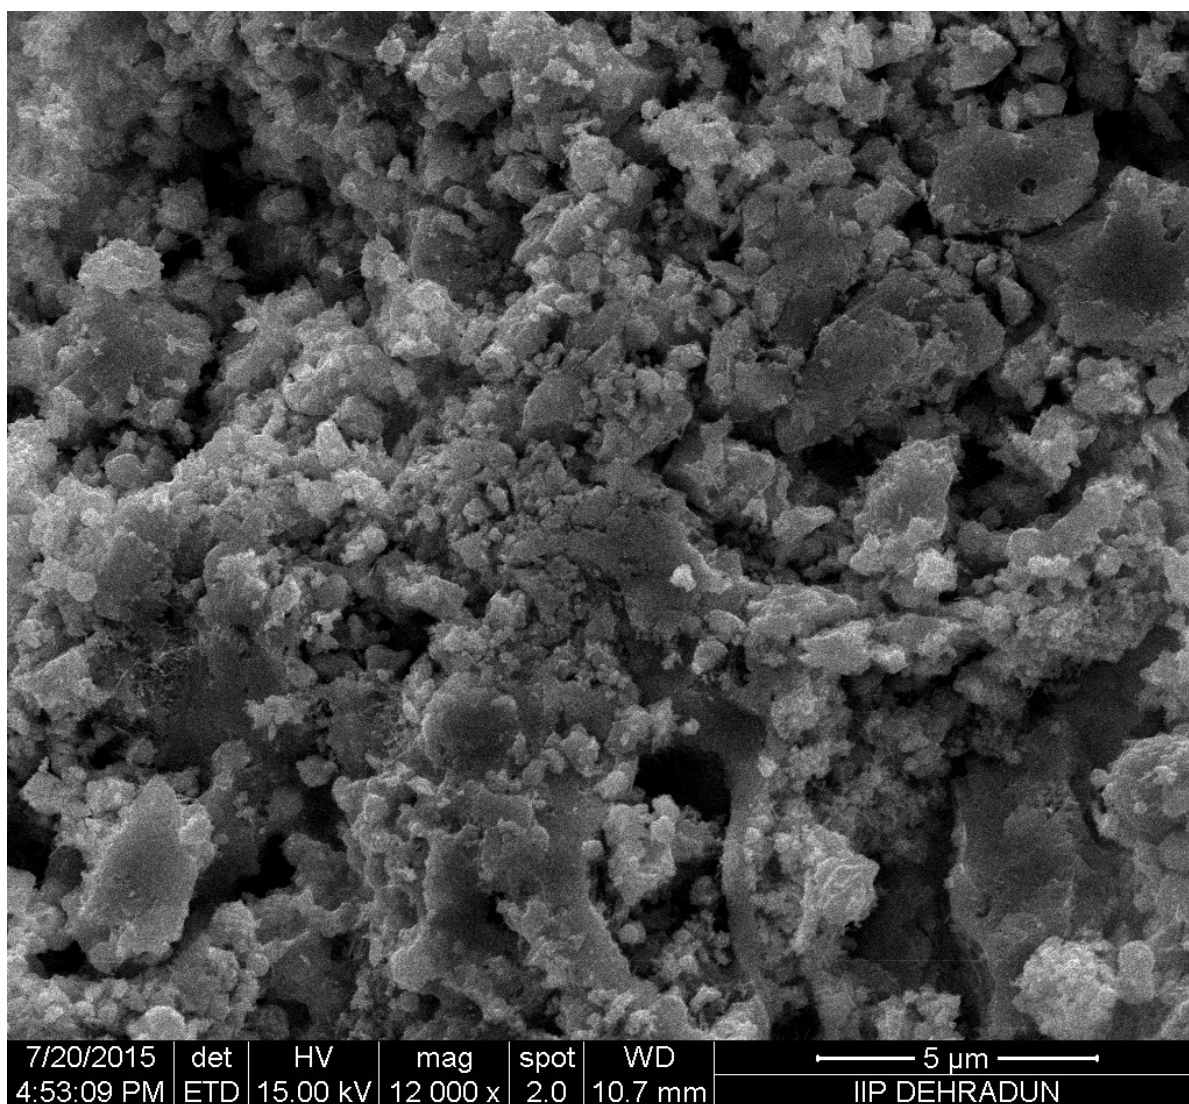

**Fig. S4** SEM image of Ag-Mn composite catalyst prepared in impregnation process.

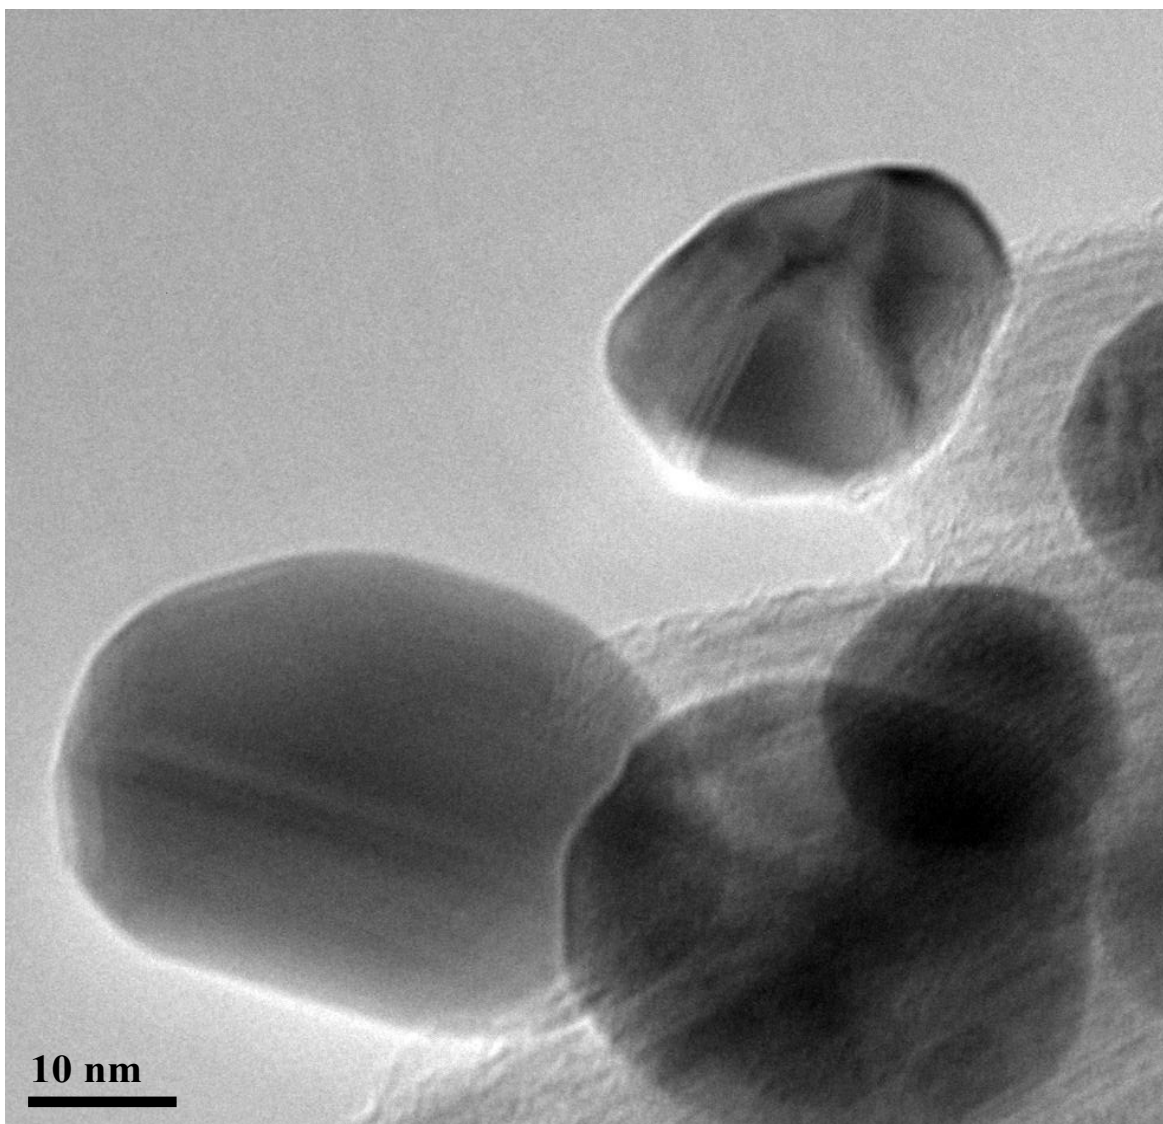

**Fig. S5** TEM image of Ag/Mn<sub>3</sub>O<sub>4</sub> nanowhiskers catalyst with Ag loading 11.7 %.

**Table S1.** Comparative studies on styrene oxidation to styrene oxide

| Entry      | Catalyst                                                                                                 | Oxidant                       | Reaction Conditions | Conversion | Selectivity | Reference           |
|------------|----------------------------------------------------------------------------------------------------------|-------------------------------|---------------------|------------|-------------|---------------------|
| 1.         | Schiff base tridentate ligand PS-[Hfsal-aepy], anchored ligand based metal complexes PS[Cu(Hfsal-aepy)Cl | TBHP + O <sub>2</sub>         | 85 °C/6h            | 70.0       | 14.9        | 1                   |
| 2.         | Au particles with size of 20–150 nm were formed on amino-modified porous polydivinylbenzene              | O <sub>2</sub>                | 100 °C/15 h         | 27.0       | 30.0        | 2                   |
| 3.         | Sphere-shaped nanosized polyoxomolybdate {Mo}132                                                         | O <sub>2</sub>                | 25 °C/3h            | 94.89      | 98          | 3                   |
| 4.         | CeO <sub>2</sub> Nano Wires                                                                              | O <sub>2</sub>                | 120 °C/5 h          | 96%        | 69%         | 4                   |
| 5.         | Hollow Silver Nanoparticle Cages Assembled with Silver Nanoparticles                                     | TBHP                          | 65 °C/4 h.          | 81.7       | 79.6        | 5                   |
| 6.         | Ga <sub>2</sub> O <sub>3</sub> Nano Rods                                                                 | H <sub>2</sub> O <sub>2</sub> | 80 °C/ 4 h          | 34.5       | 58          | 6                   |
| 7.         | Ultrathin copper oxide (CuO) nanorods                                                                    | TBHP                          | 75 °C/10 h.         | 98         | 77          | 7                   |
| 8.         | Hierarchical mesoporous vanadiumsilicate-1                                                               | TBHP                          | 100 °C/12 h         | 49%        | 54%         | 8                   |
| 9.         | 6V-MCM-48                                                                                                | H <sub>2</sub> O <sub>2</sub> | 30 °C/12 h          | 44.1       | 1.1         | 9                   |
| 10.        | 1 wt% In/TiO <sub>2</sub>                                                                                | O <sub>2</sub>                | 150 °C/ 8 h         | 52         | 82          | 10                  |
| 11.        | 0.98% CeO <sub>2</sub> -SiO <sub>2</sub>                                                                 | H <sub>2</sub> O <sub>2</sub> | 50 °C / 6h          | 72.1       | 82.1        | 11                  |
| 12.        | Ag-WO <sub>3</sub> Nanorods                                                                              | H <sub>2</sub> O <sub>2</sub> | 75 °C/12 h          | 75%        | 55%         | 12                  |
| <b>13.</b> | <b>Ag-Mn<sub>3</sub> O<sub>4</sub> Nanorods</b>                                                          | <b>O<sub>2</sub></b>          | <b>80 °C/25 h</b>   | <b>67</b>  | <b>100</b>  | <b>Present Work</b> |

## References

- 1 S. Sharma, S. Sinha and S. Chand, *Ind. Eng. Chem. Res.*, 2012, **51**, 8806–8814.
- 2 L. Wang, B. Zhang, W. Zhang, J. Zhang, X. Gao, X. Meng, D. S. Su and F. S. Xiao, *Chem. Commun.*, 2013, **49**, 3449–3451.
- 3 A. Rezaeifard, R. Haddad, M. Jafarpour and M. Hakimi, *J. Am. Chem. Soc.*, 2013, **135**, 10036–10039.
- 4 P. Pal, S. K. Pahari, A. Sinhamahapatra, M. Jayachandran, G. V. M. Kiruthika, H. C. Bajaj and A. B. Panda, *RSC Adv.*, 2013, **3**, 10837–10847.
- 5 S. Anandhakumar, M. Sasidharan, C. W. Tsao and A. M. Raichur, *ACS Appl. Mater. Interfaces*, 2014, **6**, 3275–3281.
- 6 W. Lueangchaichaweng, N. R. Brooks, S. Fiorilli, E. Gobechiya, K. Lin, L. Li, S. Parres-Esclapez, E. Javon, S. Bals, G. V. Tendeloo, J. A. Martens, C. E. A. Kirschhock, P. A. Jacobs, and P. P. Pescarmona, *Angew. Chem.*, 2014, **53**, 1585–1589.
- 7 W. Jia, Y. Liu, P. Hu, R. Yu, Y. Wang, L. Ma, D. Wang and Y. Li, *Chem. Commun.*, 2015, **51**, 8817–8820.
- 8 B. Singh and A. K. Sinha, *J. Mater. Chem. A*, 2014, **2**, 1930–1939.
- 9 H. Wang, W. Qian, J. Chen, Y. Wu, X. Xu, J. Wang and Y. Kong, *RSC Adv.*, 2014, **4**, 50832–50839.
- 10 V. Amoli, S. Farooqui, A. Rai, C. Santra, S. Rahman, A. K. Sinha and B. Chowdhury, *RSC Adv.*, 2015, **5**, 67089–67092.
- 11 B. Sarkar, R. K. Singha, R. Tiwari, S. Ghosh, S. S. Acharyya, C. Pendem, L. N. S. Konathala and R. Bal, *RSC Adv.*, 2014, **4**, 5453–5456.
- 12 S. Ghosh, S. S. Acharyya, M. Kumar and R. Bal, *RSC Adv.*, 2015, **5**, 37610–37616.
